# Supplementary material for: Comparison of Bacterial Burden and Cytokine Gene Expression in Golden Hamsters in Early Phase of Infection with Two Different Strains of Leptospira interrogans
Source: PubMed Central journal article supplement (PMC4492770; doi:10.1371/journal.pone.0132694), 2015-07-06
Supplement: pone.0132694.s006.pdf [file pone.0132694.s006.pdf]

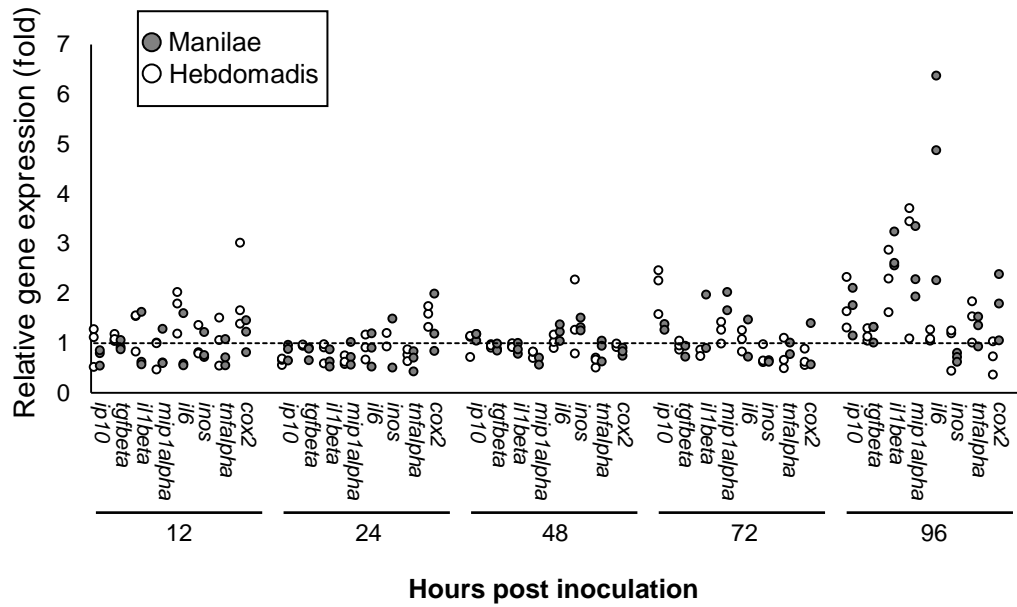

**S5 Fig. Temporal change of cytokine gene expressions in lung of hamsters infected with serovars Manilae or Hebdomadis strains.**
