# Supplementary material for: Comparison of Bacterial Burden and Cytokine Gene Expression in Golden Hamsters in Early Phase of Infection with Two Different Strains of Leptospira interrogans
Source: PubMed Central journal article supplement (PMC4492770; doi:10.1371/journal.pone.0132694), 2015-07-06
Supplement: pone.0132694.s008.pdf [file pone.0132694.s008.pdf]

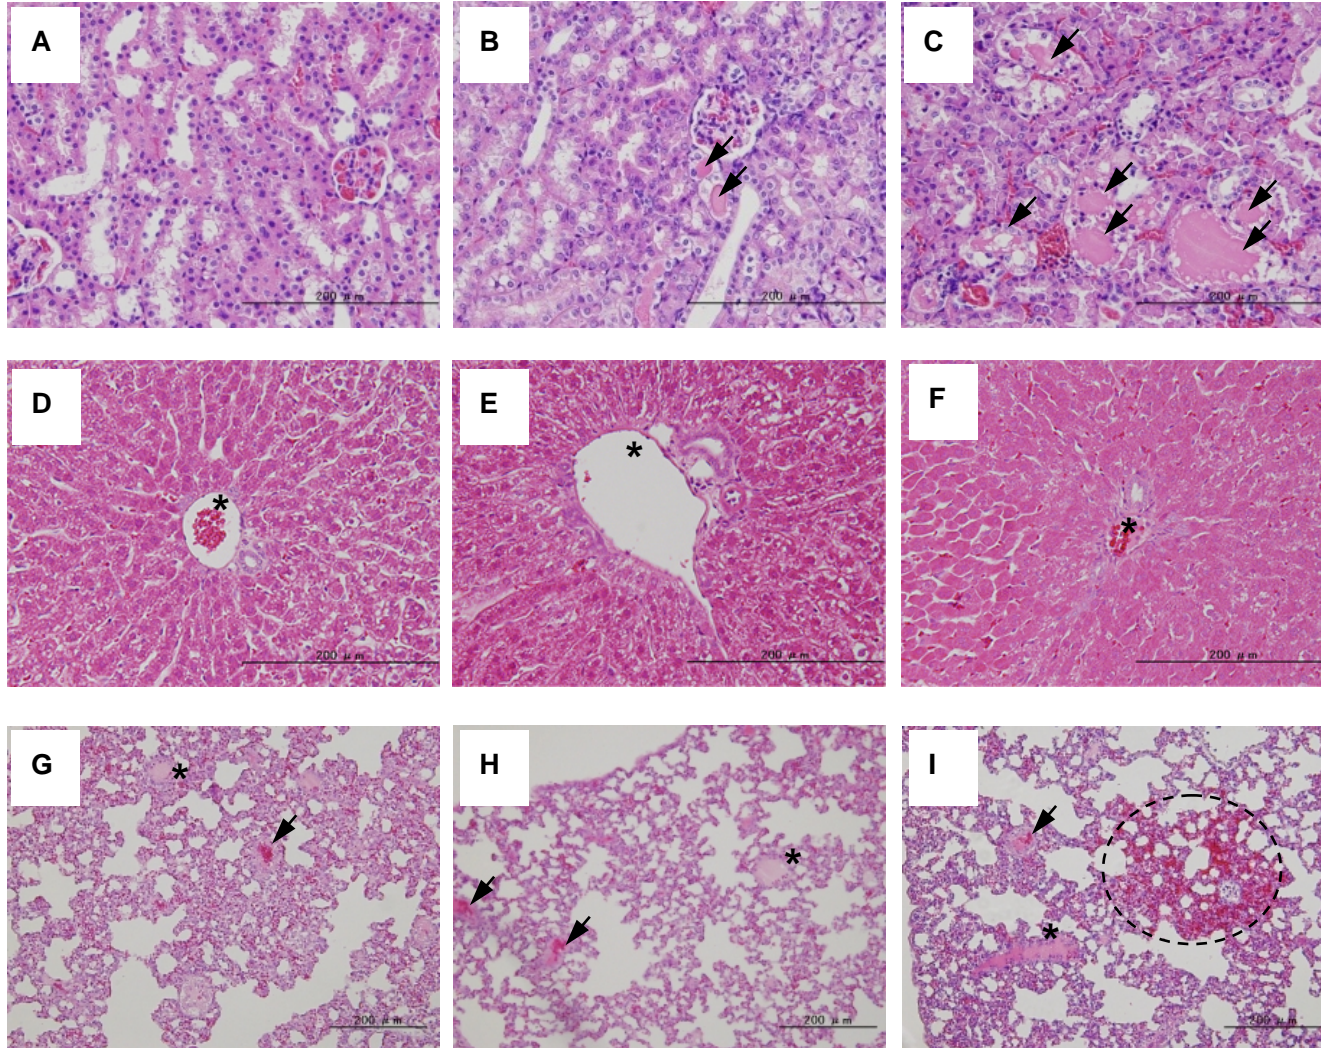

**S7 Fig. Histological lesions in hamsters infected with serovar Manilae or Hebdomadis strains at 96 h post inoculation (hematoxylin and eosin stain).**
